# Supplementary material
Source: PubMed Central journal article supplement (PMC7704032)

Full Blots for Figure 4d.

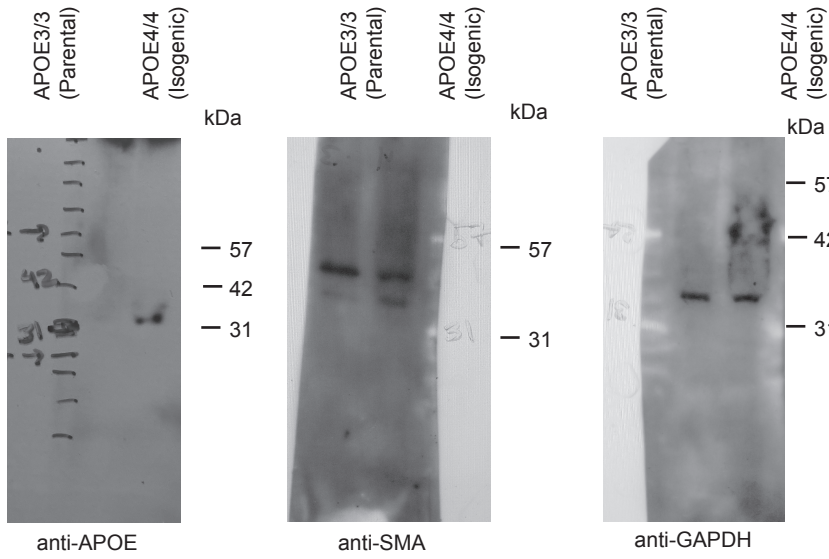

Full Blots for Extended Figure 5j.

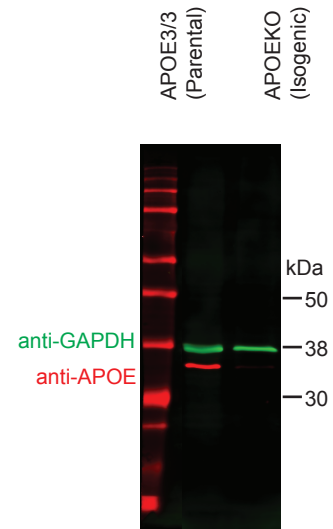

Full Blots for Extended Figure 6b.

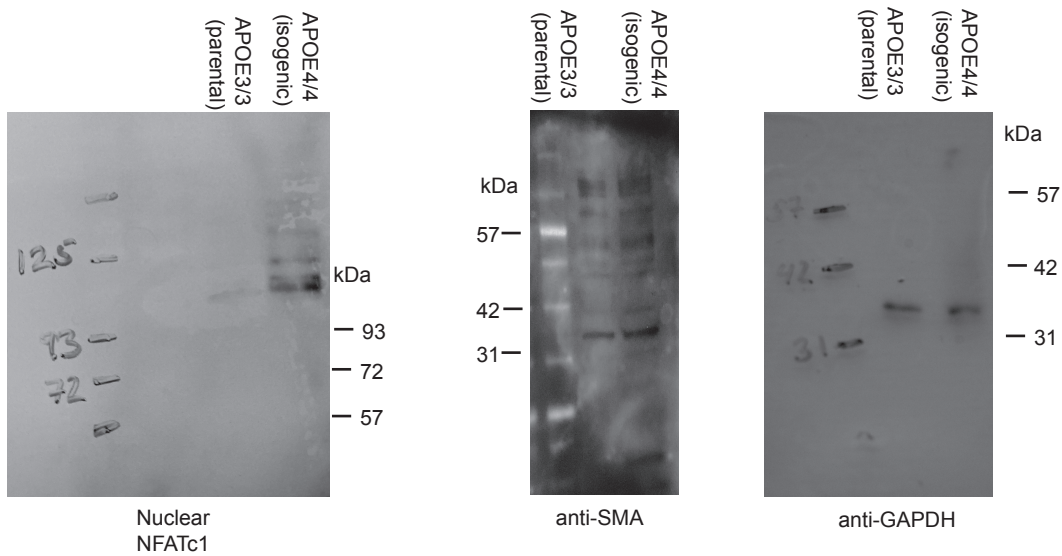

Supplement: NIHMS1631046-supplement-1631046_SourceDataFig1.pdf [file NIHMS1631046-supplement-1631046_SourceDataFig1.pdf]
